# Supplementary material for: Large size anion binding with iron(ii) complexes of a 5,5′-disubstituted-2,2′-bipyridine ligandElectronic supplementary information (ESI) available: synthesis and characterization of 1a–c. All new compounds were characterised by CHN, 1H NMR, and ESI-MS. See http://www.rsc.org/suppdata/cc/b2/b211616b/
Source: Royal Society of Chemistry journal article supplement (doi:10.1039/b211616b), 2003-03-07
Supplement: b211616b.doc [file b211616b.doc]

Large size anion binding with iron(II) complexes of a 5,5'-disubstituted-2,2'-bipyridine ligand

Biao Wu, Xiao-Juan Yang, Christoph Janiak*, Paul Gerhard Lassahn

Institut für Anorganische und Analytische Chemie, Universität Freiburg, Albertstr. 21, 79104 Freiburg, Germany. Fax: 49 761 2036147; Tel: 49 761 2036127; E-mail: janiak@uni-freiburg.de

# Supplementary Data

**Experimental**

NMR spectra were recorded on a Bruker Avance DPX200 or a Varian Unity-300 spectrometer (200.1 or 300.1 MHz, respectively, for 1H) with calibration against the solvent signal (CD3OD 3.31 ppm for CD3, d6-DMSO 2.50 ppm for 1H). IR spectra were carried out using a Bruker Optic IFS 25 spectrometer as KBr disks. Elemental analysis were done on a VarioEL from Elementaranalysensysteme GmbH. ESI-MS measurements were carried out using a Finnigan MAT TSQ7000 spectrometer with methanol/water and formic or trifluoroacetic acid (HCOOH or TFA, respectively) (3%) being the solvent. Mass spectra were measured in positive mode in the range m/z = 200 – 1400.

[Fe(**L**)3]SO4 **1a** was synthesized by reaction of a hot ethanolic solution (10 ml) of **L** (100 mg, 0.30 mmol) with an aqueous solution of FeSO4·7H2O (28 mg, 0.10 mmol). After 10 min of stirring, the small amount of precipitate was removed through filtering. The filtrate was evaporated slowly. After a few days, dark-red microcrystals were obtained and washed with H2O and hot EtOH. Crystals suitable for diffraction study were recrystallized from CH3OH. Yield (49 mg, 85 %). Found: C 49.33, H 4.92, N 14.16, S 2.39, calc. (**1a**·H2O·CH3OH) C 49.33, H 5.07, N 14.09, S 2.69%.

1 H NMR (methanol-*d*4), 8.47 (d, J3 = 8.8 Hz, 2H, *H*3,3'), 8.12 (d, J3 = 8.9 Hz, 2H, *H*4,4'), 7.91 (s, 2H, *H*6,6'), 4.13 (q, 4H, -C*H*2-), 1.26 (t, 6H, -C*H*3).

1 H NMR (DMSO-*d*6), 10.24 (s, br, 2H, N*H*, **1**), 9.95 (s, 2H, N*H*, **L**), 8.69 (d, J3 = 2.2 Hz, 2H, *H*6,6', **L**), 8.56 (s, br, 2H, *H*3,3', **1**), 8.22 (m, 4H, *H*4,4', **1** + *H*3,3', **L**), 7.99 (dd, 2H, *H*4,4', **L**), 7.44 (s, br, 2H, *H*6,6', **1**), 4.11 (m, 8H, -C*H*2-, **L**+**1**), 1.21 (m, 12H, -C*H*3, **L**+**1**).

ESI-MS (ionization with MeCN/H2O/HCOOH 3%,), *m/z* (%), 761 ([Fe(**L**)22++HCOO-]+, 52), 523 ([Fe(**L**)3]2+, 100).

[Fe(**L**)3](ClO4)2, **1b** was synthesized by a similar method to **1a** except for Fe(ClO4)2·6H2O instead of FeSO4·7H2O. The dark-red crystals were recrystallized from methanol/diethyl ether. Yield (108 mg, 86%). Found: C 45.07, H 4.49, N 12.80; calc. (**1b**·2H2O) C 44.98, H 4.56, N 13.11%.

1 H NMR (methanol-*d*4), see **1a**. 1H NMR (DMSO-*d*6), 10.23 (s, 2H, N*H*), 8.59 (d, J3 = 9Hz, 2H, *H*3,3'), 8.28 (dd, J3 = 9 Hz, J4 = 2Hz, 2H, *H*4,4'), 7.44 (d, J4 = 2 Hz, 2H, *H*6,6'), 4.08 (q, 4H, -C*H*2-), 1.18 (t, 6H, -C*H*3).

ESI-MS (ionization with MeCN/H2O/TFA 3%), *m/z* (%), 1110 ([Fe(**L**)32++2CH3OH-H+]+, 15), 828 ([Fe(**L**)22++CF3CO2-]+, 100), 523 ([Fe(**L**)3]2+, 28), 331 ([**L**+H+]+, 73).

### [Fe(**L**)3](NO3)2, **1c** was synthesized by a similar method except for Fe(NO3)3·9H2O and the presence of iron powder instead of FeSO4·7H2O. The dark-red crystals were recrystallized from ethanol/H2O. Yield (88 mg, 75%). Found: C 46.70, H 5.37, N 15.80; calc. (**1c**·4H2O) C 46.38, H 5.03, N 15.80%.

### 1H NMR (methanol-d4), see **1a**.

### 1H NMR (DMSO-d6), see **1b**.

### ESI-MS (ionization with MeCN/H2O/TFA 3%), m/z (%), 1110 ([Fe(**L**)32++2CH3OH-H+]+, 18), 828 ([Fe(**L**)22++CF3CO2-]+, 100), 331 ([**L**+H+]+, 82), 523 ([Fe(**L**)3]2+, 27).

Crystallographic data (excluding structure factors) for the structure of **1a–c** have been deposited with the Cambridge Crystallographic Data Centre (CCDC reference numbers 198626, 198627 and 198628) and are also provided as electronic supplementary material (ESI) in CIF-format. Copies of the data can be obtained free of charge on application to CCDC, 12 Union Road, Cambridge CB2 1EZ, UK (fax: (+44) 1223-336-033; e-mail: [deposit@ccdc.cam.ac.uk](mailto:deposit@ccdc.cam.ac.uk)).
